# Supplementary material for: Schisandrol A protects AGEs-induced neuronal cells death by allosterically targeting ATP6V0d1 subunit of V-ATPase
Source: PubMed Central journal article supplement — Acta Pharm Sin B. 2022 Jun 30;12(10):3843–60. doi: 10.1016/j.apsb.2022.06.013 (PMC9532558; doi:10.1016/j.apsb.2022.06.013), 2022-06-30
Supplement: mmc1.pdf [file mmc1.pdf]

## Supporting Information for

### Original article

# Schisandrol A protects AGEs-induced neuronal cells death by allosterically targeting ATP6V0d1 subunit of V-ATPase

Xiaoqing Zhou<sup>a,†</sup>, Shaoyang Zhao<sup>a,†</sup>, Tingting Liu<sup>a,†</sup>, Lu Yao<sup>a</sup>, Meimei Zhao<sup>a</sup>, Xiaoming Ye<sup>a</sup>, Xiaowen Zhang<sup>a</sup>, Qiang Guo<sup>a</sup>, Pengfei Tu<sup>a</sup>, Kewu Zeng<sup>a,\*</sup>

<sup>a</sup>State Key Laboratory of Natural and Biomimetic Drugs, School of Pharmaceutical Sciences, Peking University, Beijing 100191, China

Received 13 January 2022; received in revised form 30 April 2022; accepted 24 May 2022

\*Corresponding author.

E-mail address: ZKW@bjmu.edu.cn (Kewu Zeng).

†These authors made equal contributions to this work.

## 1. Supporting table

**Table S1** Name abbreviation of three structurally similar compounds.

| Compound name      | Schisandrol A                                                                       | Schisandrin A                                                                       | Schisandrol B/Gomisin A                                                               |
|--------------------|-------------------------------------------------------------------------------------|-------------------------------------------------------------------------------------|---------------------------------------------------------------------------------------|
| CAS number         | 7432-28-2                                                                           | 61281-38-7                                                                          | 58546-54-6                                                                            |
| Molecular formula  | C <sub>24</sub> H <sub>32</sub> O <sub>7</sub>                                      | C <sub>24</sub> H <sub>32</sub> O <sub>6</sub>                                      | C <sub>23</sub> H <sub>28</sub> O <sub>7</sub>                                        |
| Molecular weight   | 432.507                                                                             | 416.507                                                                             | 416.464                                                                               |
| Chemical structure | 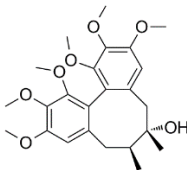 |  |  |
| Abbreviation       | SolA                                                                                | SchA                                                                                | SolB/GomA                                                                             |

## 2. Supporting figures

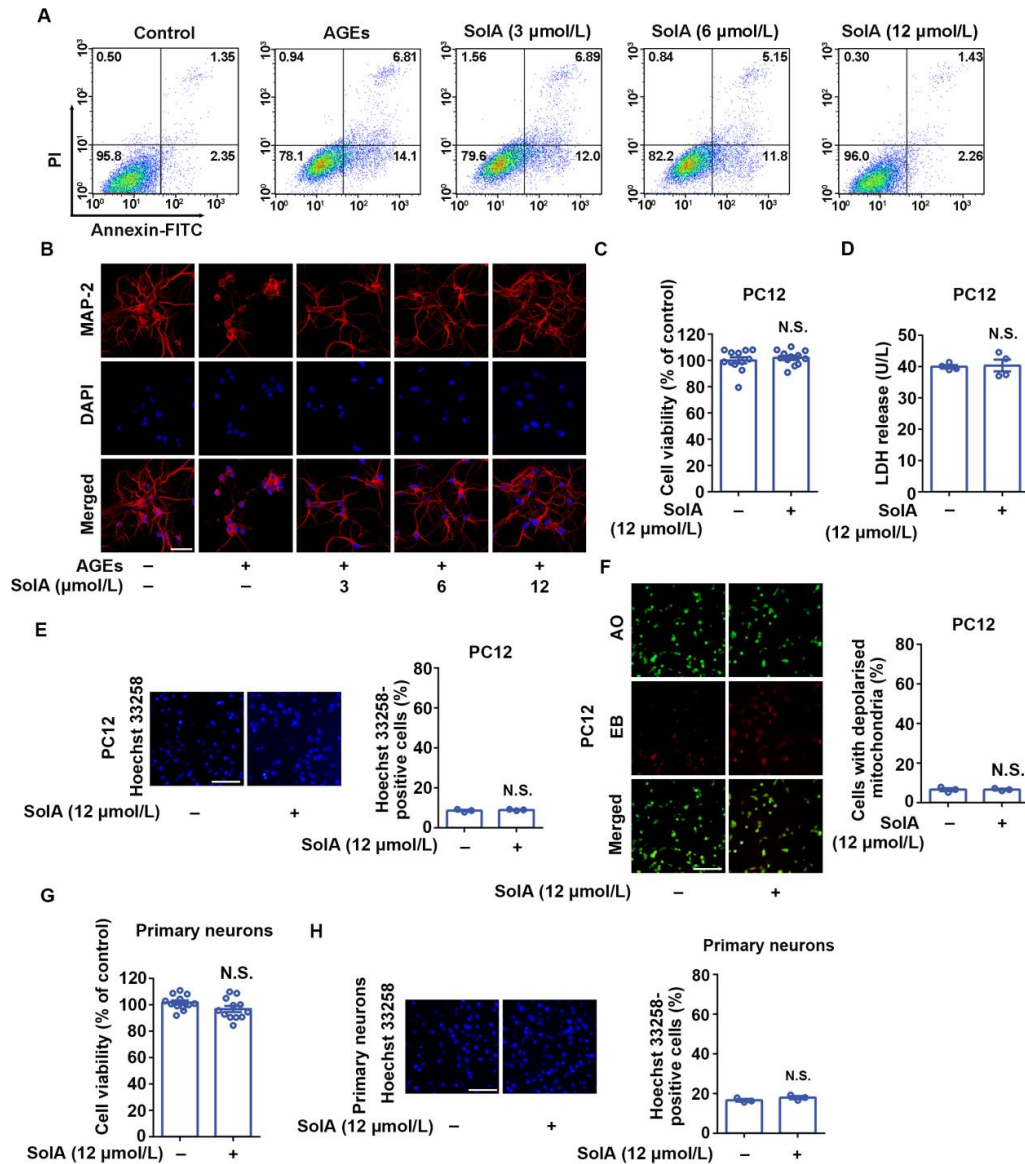

**Figure S1 (Related to Fig. 1).** Discovery of SolA as a neuroprotective small-molecule against AGEs-induced injury. (A) Sol A inhibited PC12 cells apoptosis by Annexin V-FITC/PI assay. (B) Sol A protected primary neurons from morphological damage by immunofluorescence staining of MAP-2 (scale bar: 40 μm). (C) SolA (12 μmol/L) alone had no effect on the cell viability in AGEs-induced PC12 cells ( $n = 12$ ). (D) SolA (12 μmol/L) alone had no effect on LDH release in AGEs-induced PC12 cells ( $n = 4$ ). (E) SolA (12 μmol/L) alone had no effect on PC12 cells apoptosis by Hoechst 33258 staining (scale bar: 100 μm,  $n = 3$ ). (F) SolA (12 μmol/L) alone had no effect on PC12 cells apoptosis by double staining with AO and EB (scale bar: 100 μm,  $n = 3$ ). (G) SolA (12 μmol/L) alone had no effect on the cell viability in AGEs-induced rat primary neurons ( $n = 12$ ). (H) SolA (12 μmol/L) alone had no effect on rat primary neurons apoptosis by Hoechst 33258 staining (scale bar: 100 μm,  $n = 3$ ). Data are expressed as the mean ± SEM. N.S. not significant (Student's  $t$ -test).

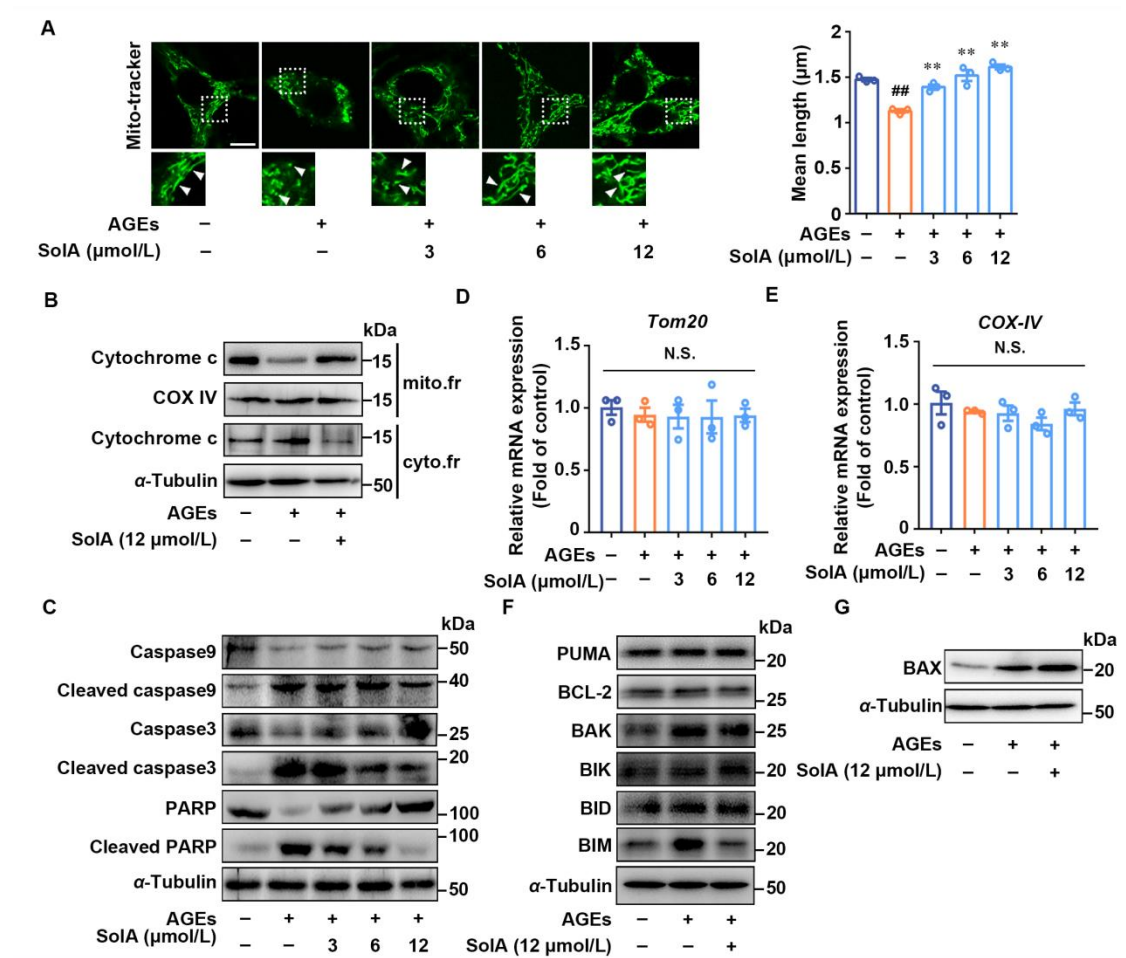

**Figure S2 (Related to Fig. 2).** SolA maintains mitochondrial homeostasis by promoting BIM degradation. (A) SolA improved AGEs-induced PC12 mitochondrial damage by Mito-tracker staining (scale bar: 10  $\mu\text{m}$ ,  $n = 3$ ). (B) SolA had no effect on the mRNA expressions of *Tom20* ( $n = 3$ ). (C) SolA had no effect on the mRNA expressions of *COX IV* ( $n = 3$ ). (D) SolA (12  $\mu\text{mol/L}$ ) inhibited cytochrome *c* release from mitochondria into cytosol. (E) SolA inhibited caspase9, caspase3 and PARP cleavage. (F) SolA (12  $\mu\text{mol/L}$ ) significantly inhibited BIM expression rather than other mitochondrial proteins. (G) SolA had no effect on BAX expression. Data are expressed as the mean  $\pm$  SEM. ## $P < 0.01$  vs. control group, \*\* $P < 0.01$  vs. AGEs group.

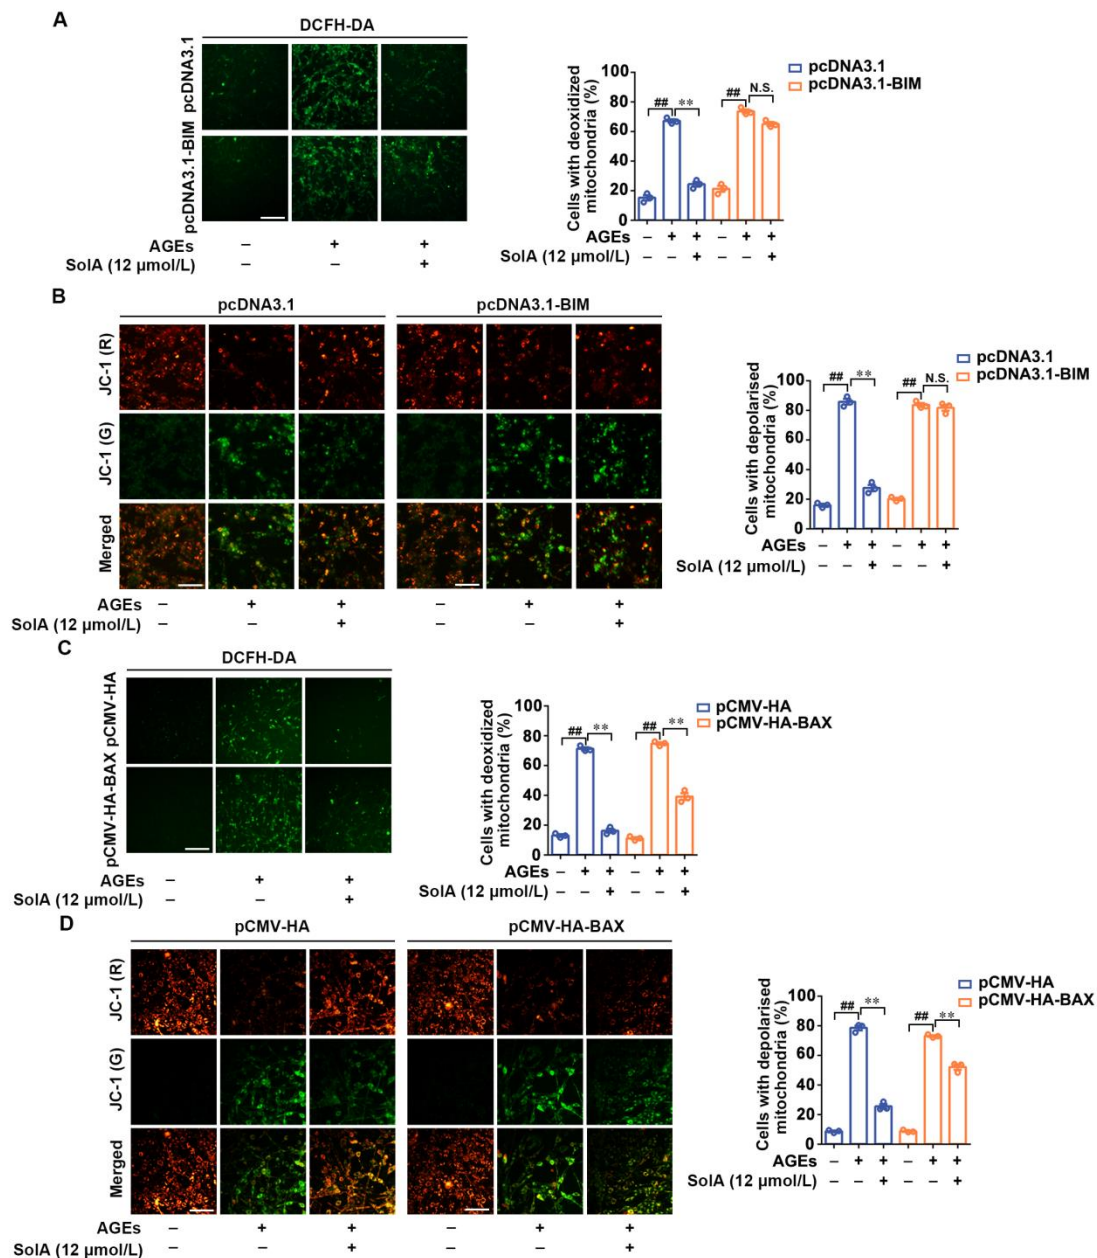

**Figure S3 (Related to Fig. 2).** SoIA maintains mitochondrial homeostasis by promoting BIM degradation. (A) BIM overexpression reversed SoIA (12  $\mu$ mol/L)-mediated ROS decrease (scale bar: 200  $\mu$ m,  $n = 3$ ). (B) BIM overexpression reversed SoIA (12  $\mu$ mol/L)-mediated mitochondrial depolarization decrease by JC-1 staining (scale bar: 200  $\mu$ m,  $n = 3$ ). (C) BAX overexpression reversed SoIA (12  $\mu$ mol/L)-mediated ROS decrease (scale bar: 200  $\mu$ m,  $n = 3$ ). (D) BAX overexpression reversed SoIA (12  $\mu$ mol/L)-mediated mitochondrial depolarization decrease by JC-1 staining (scale bar: 200  $\mu$ m,  $n = 3$ ). Data are expressed as the mean  $\pm$  SEM. ##  $P < 0.01$  vs. control group, \*\*  $P < 0.01$  vs. AGEs group.

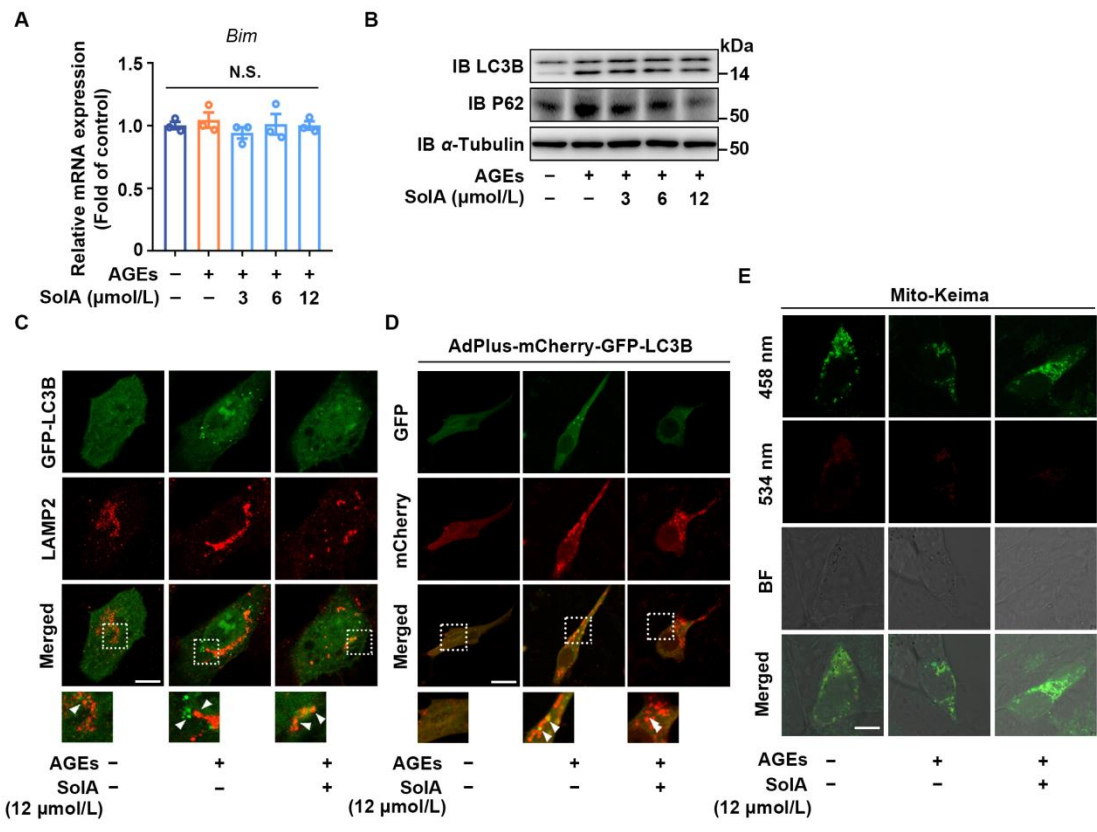

**Figure S4 (Related to Fig. 2).** SolA maintains mitochondrial homeostasis by promoting BIM degradation. (A) SolA did not regulate *Bim* mRNA expression. (B) SolA slightly decreased P62 and LC3B level ( $n = 3$ ). (C) SolA (12  $\mu\text{mol/L}$ ) increased the co-localization of LC3B and lysosomes (scale bar: 10  $\mu\text{m}$ ). (D) SolA (12  $\mu\text{mol/L}$ ) reactivated autophagy flux by mCherry-eGFP-LC3B dual fluorescence system (scale bar: 20  $\mu\text{m}$ ). (E) SolA showed no obvious effect on the mitophagy in PC12 cells (scale bar: 10  $\mu\text{m}$ ). Data are expressed as the mean  $\pm$  SEM. N.S. not significant.



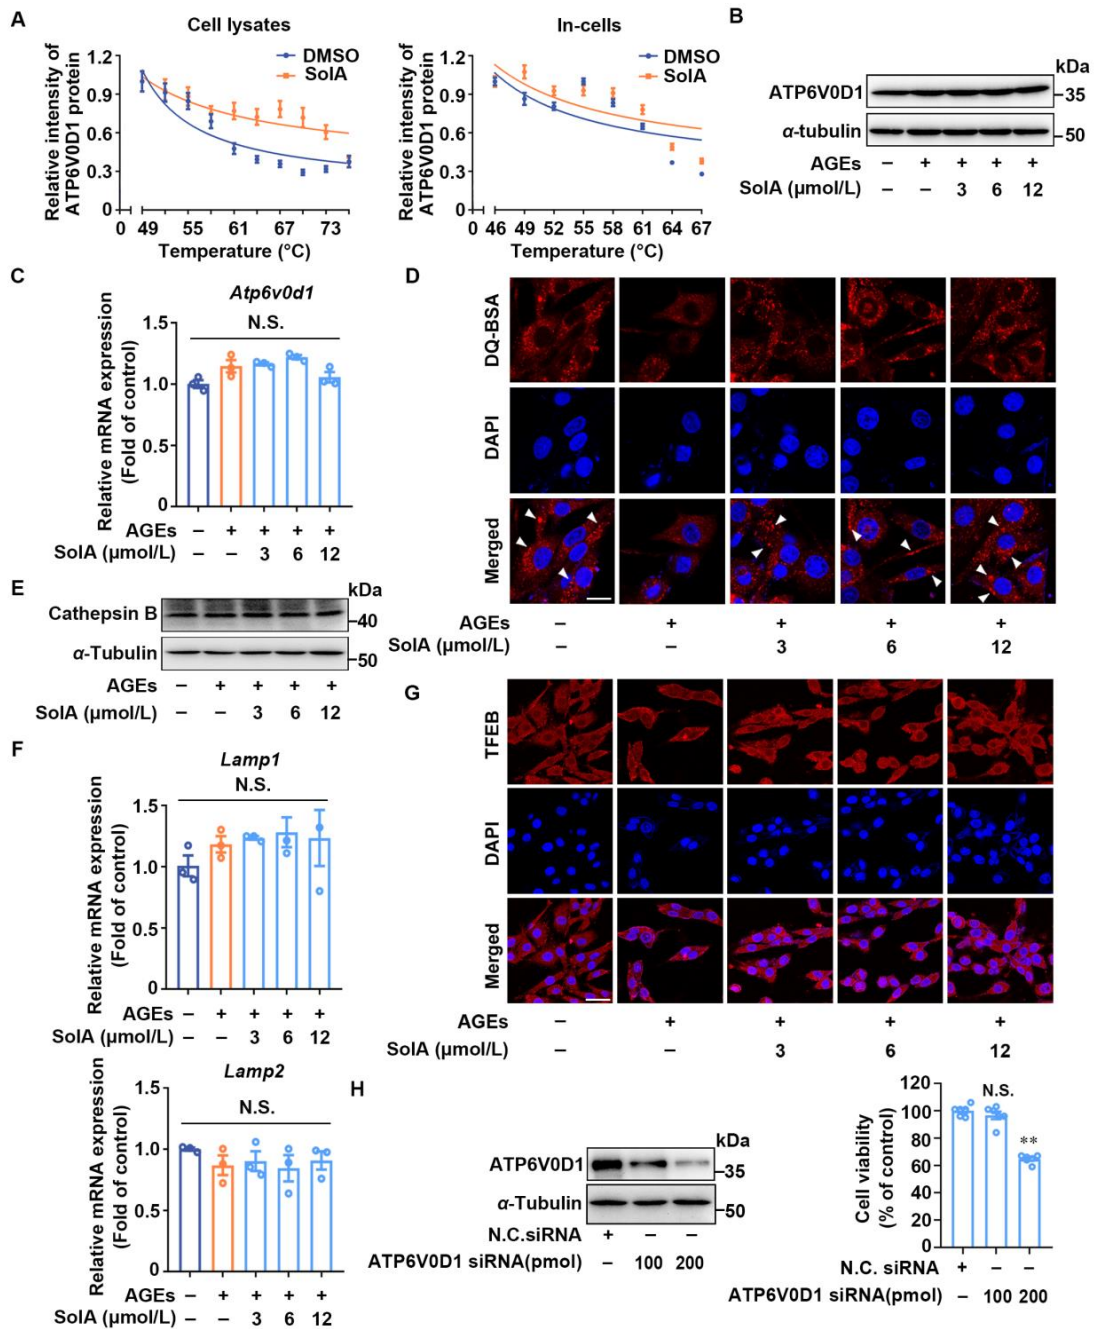

**Figure S5 (Related to Fig. 3).** Identification of V-ATPase subunit ATP6V0D1 as a cellular target of SolA. (A) SolA promoted ATP6V0D1 resistant to different temperature gradients ( $n = 3$ ). (B) SolA had no effect on ATP6V0D1 protein expression. (C) SolA did not regulate *Atp6v0d1* mRNA expression in PC12 cells ( $n = 3$ ). (D) SolA promoted lysosomal proteolytic activity in a concentration-dependent manner (scale bar: 20  $\mu$ m). Arrows indicate brightly stained lysosomes. (E) SolA had no effect on cathepsin B expression. (F) SolA did not regulate the transcriptions of *Lamp1* and *Lamp2* ( $n = 3$ ). (G) SolA showed no obvious effect on the nuclear translocation of TFEB in AGEs-induced PC12 cells (scale bar: 40  $\mu$ m). (H) Excessive knockdown of ATP6V0D1 led to serious injury of neuronal cells ( $n = 6$ ). Data are expressed as the mean  $\pm$  SEM. \*\* $P < 0.01$  vs. AGEs group. N.S. not significant.

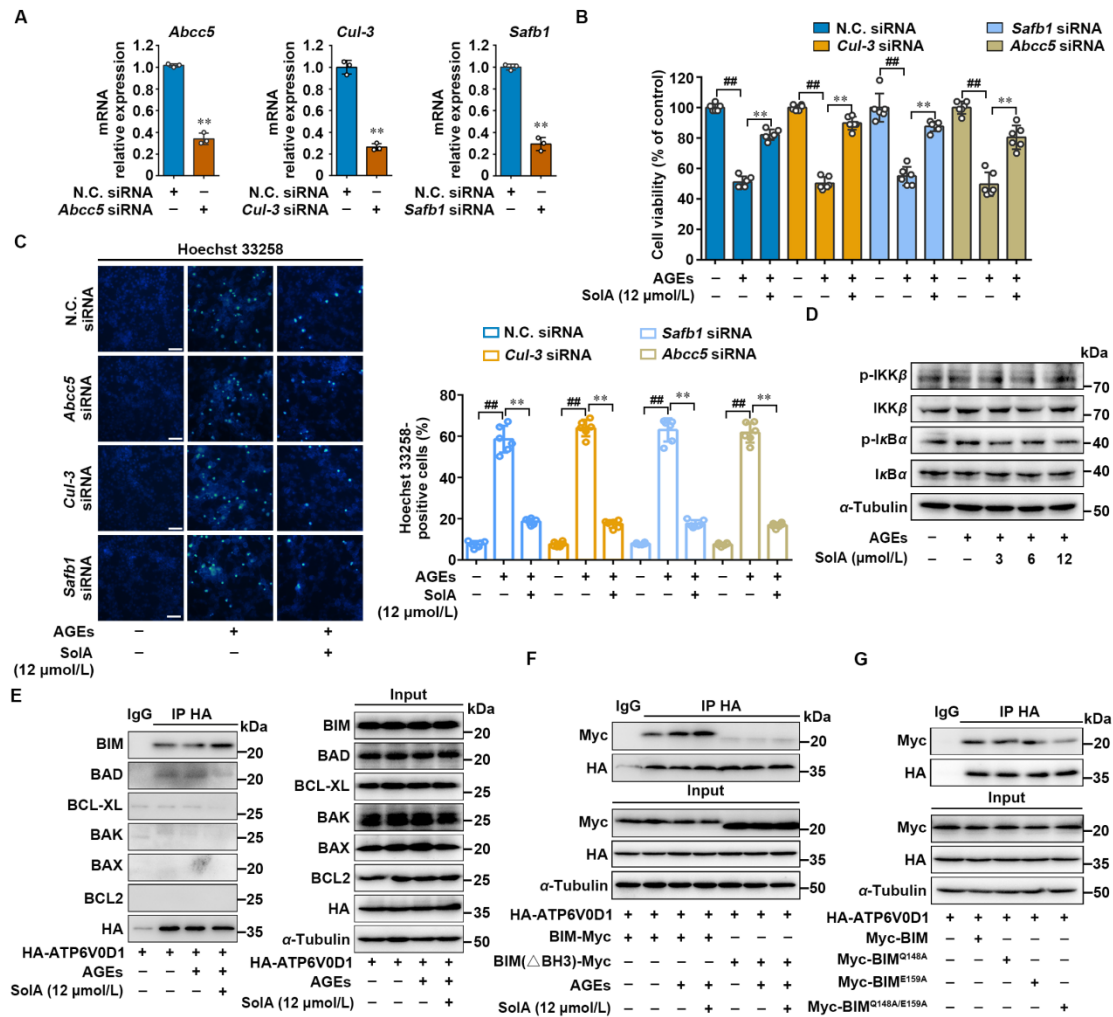

**Figure S6 (Related to Fig. 4).** SolA protects against cell death through lysosome-mitochondria crosstalk. (A) *Abcc5*, *Cul-3* and *Safb1* were knocked down by siRNA in PC12 cells ( $n = 3$ ).  $**P < 0.01$  (Student's  $t$ -test). (B) *Abcc5*, *Cul-3* and *Safb1* deletion had no effect on SolA (12  $\mu\text{mol/L}$ )-mediated PC12 cell viability by MTT ( $n = 6$ ). (C) *Abcc5*, *Cul-3* and *Safb1* deletion had no effect on SolA (12  $\mu\text{mol/L}$ )-mediated PC12 cell survival by Hoechst 33258 staining (scale bar: 100  $\mu\text{m}$ ,  $n = 6$ ). (D) SolA (12  $\mu\text{mol/L}$ ) did not regulate IKK cascade in PC12 cells. (E) SolA (12  $\mu\text{mol/L}$ ) failed to induce BAD, BCL-XL, BAK, BAX and BCL-2 binding to ATP6V0D1 in AGEs-induced PC12 cells. (F) BH3-deletion BIM ( $\Delta\text{BH3}$ -BIM) failed to bind with ATP6V0D1 in AGEs-induced PC12 cells. (G) Glu159 rather than Gln148 mediated BIM-ATP6V0D1 interaction. Data are expressed as the mean  $\pm$  SEM.  $##P < 0.01$  vs. control group,  $**P < 0.01$  vs. AGEs group.

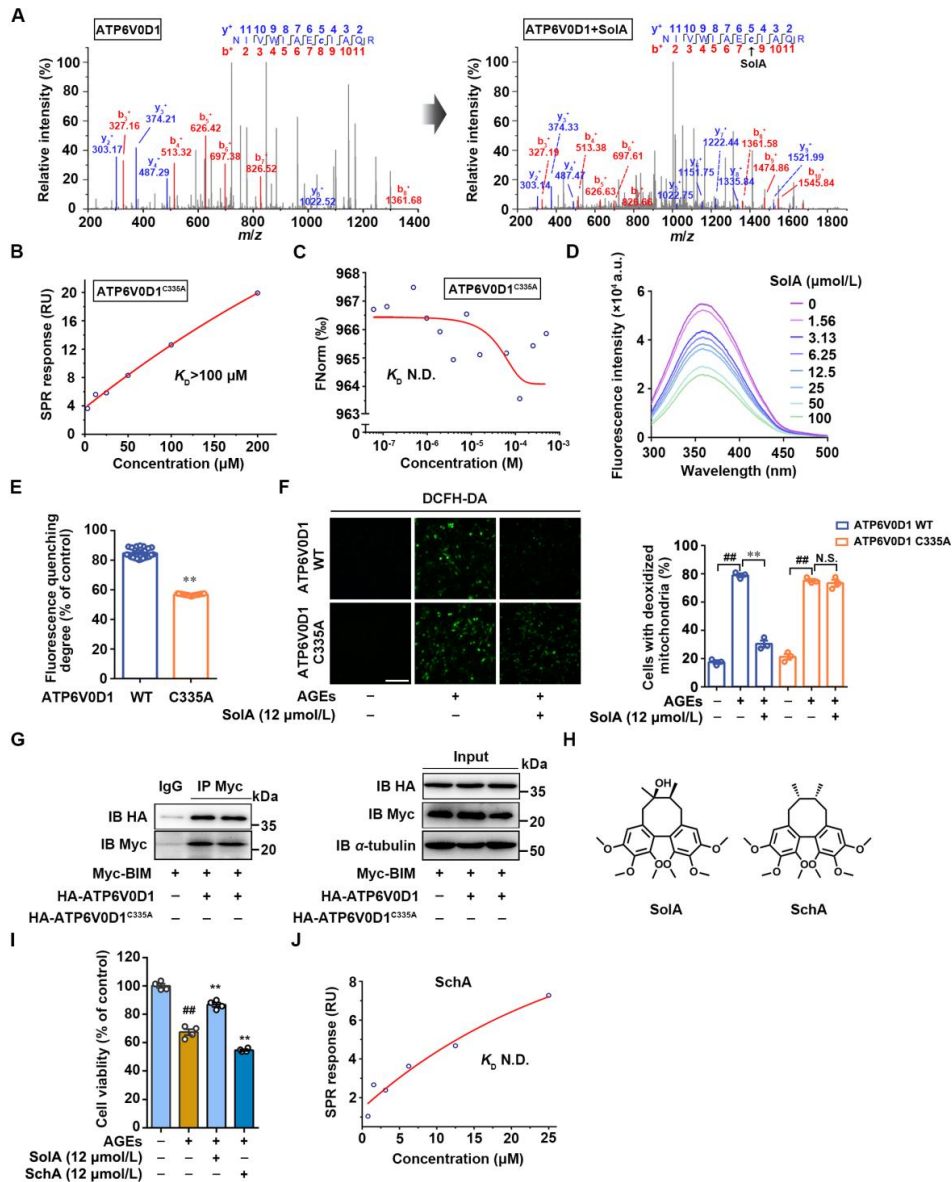

**Figure S7 (Related to Fig. 5).** Cys335 serves as a pharmacological allosteric site of ATP6V0D1. (A) Trypsin-digest LC-MS/MS analysis revealed Cys335 as a binding site of SolA. Recombinant ATP6V0D1 was incubated with (bottom) or without (top) SolA. (B) Binding affinity of SolA with ATP6V0D1<sup>C335A</sup> was determined by SPR. (C) Binding affinity of SolA with ATP6V0D1<sup>C335A</sup> was determined by MST. (D) Tryptophan fluorescence quenching assay for SolA-mediated ATP6V0D1<sup>C335A</sup> conformational change. (E) Representative comparison of SolA-mediated ATP6V0D1<sup>WT</sup> and ATP6V0D1<sup>C335A</sup> conformational change on fluorescence quenching capacity ( $n = 119$ ). (F) ATP6V0D1 C335A mutation reversed SolA (12  $\mu\text{mol/L}$ )-mediated ROS decrease by DCFH-DA detection (scale bar: 200  $\mu\text{m}$ ,  $n = 3$ ). (G) Cys335 mutation of ATP6V0D1 had no effect on the interaction of ATP6V0D1 and BIM. (H) Chemical structures of SolA and SchA. (I) SolA (12  $\mu\text{mol/L}$ ) rather than SchA (12  $\mu\text{mol/L}$ ) increased the cell viability in AGEs-induced PC12 cells ( $n = 4$ ). (J) Binding affinity analysis of SchA with ATP6V0D1 determined by SPR. Data are expressed as the mean  $\pm$  SEM.  $##P < 0.01$  vs. control group,  $**P < 0.01$  vs. AGEs group. N.S. not significant.



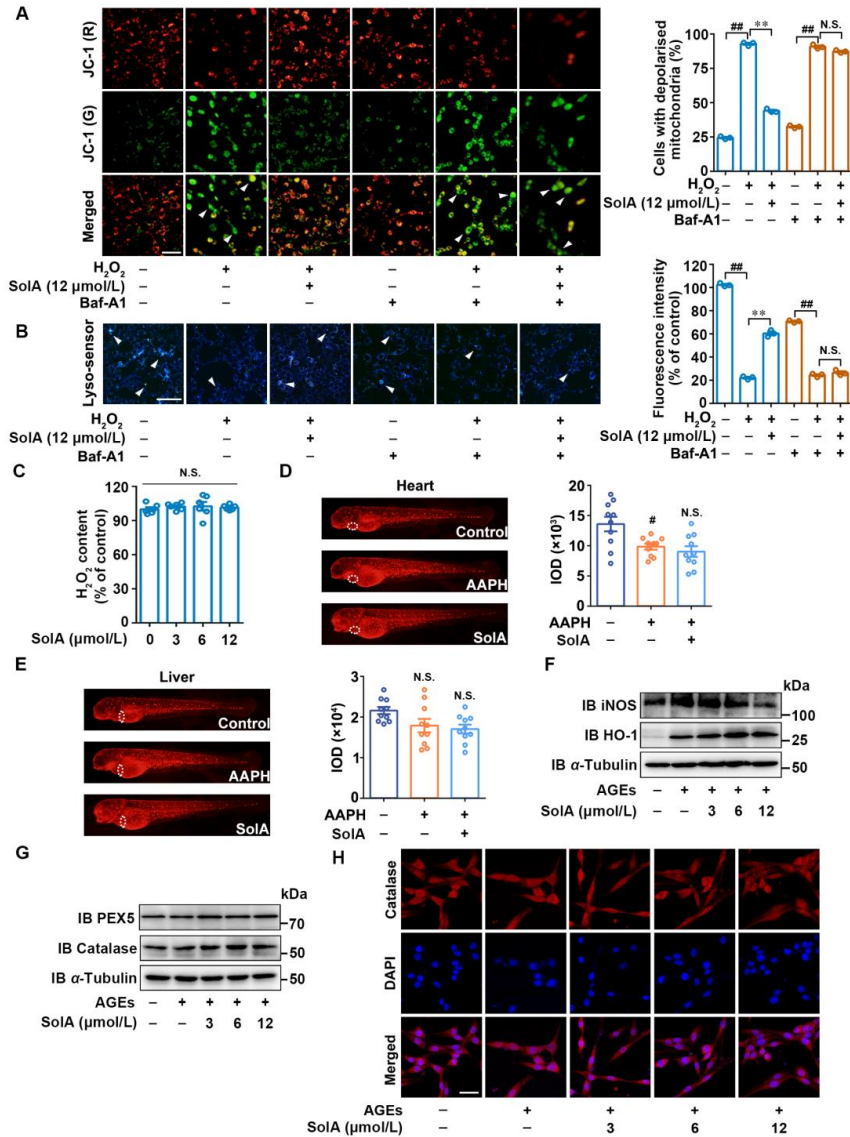

**Figure S8 (Related to Fig. 6).** ATP6V0D1 is necessary for SolA-mediated mitochondrial protection and lysosomal acidification. (A) Baf-A1 eliminated SolA-mediated mitochondrial depolarization by JC-1 staining in H<sub>2</sub>O<sub>2</sub>-induced PC12 cells (scale bar: 100 μm, *n* = 3). Arrows indicate the cells with depolarized mitochondria. (B) Baf-A1 reversed SolA-mediated lysosomal acidification by Lyso-sensor detection in H<sub>2</sub>O<sub>2</sub>-induced PC12 cells (scale bar: 100 μm, *n* = 3). Arrows indicate highly acidic lysosomes. (C) SolA did not directly react with H<sub>2</sub>O<sub>2</sub> (*n* = 6). (D) SolA (6 μmol/L) failed to enhance mitochondrial activity by Mito-tracker Red CMXRos staining in 2,2'-azobis(2-methylpropionamidine) (AAPH)-induced zebrafish heart (*n* = 10). AAPH (6.25 mmol/L) was used to induce the oxidative stress state. (E) AAPH or SolA (6 μmol/L) had no effect on mitochondrial activity by Mito-tracker Red CMXRos staining in zebrafish liver (*n* = 10). (F) SolA moderately decreased iNOS level and slightly increased HO-1 level. (G) SolA did not regulate the protein levels of PEX5 and catalase. (H) SolA had no effect on the fluorescence intensity of catalase (scale bar: 40 μm). Data are expressed as the mean ± SEM. #*P* < 0.05, ##*P* < 0.01 vs. control group, \*\**P* < 0.01 vs. H<sub>2</sub>O<sub>2</sub> group. N.S. not significant.
